# Supplementary material for: Serological Cross-Reaction between Six Thiadiazine by Indirect ELISA Test and Their Antimicrobial Activity
Source: MDPI journal article supplement (doi:10.3390/mps6020037), 2023-04-03
Supplement: s1 [file s1]

**Serological cross-reaction between six Thiadiazine by indirect ELISA test and their anti-microbial activity.**

Mishell Ortiz<sup>1</sup>, Hortensia Rodriguez<sup>2</sup>, Elisabetta Lucci<sup>3</sup>, Julieta Coro<sup>4</sup>, Beatriz Pernia<sup>5</sup>,  
Abigail Montero<sup>1</sup>, Francisco Javier Tingo-Jácome<sup>7</sup>, Leslie Espinoza<sup>1</sup> and Lilian  
Spencer<sup>1,6\*</sup>

<sup>1</sup>School of Biological Sciences and Engineering, Yachay Tech University, San

Miguel de Urququí, Ecuador; <https://orcid.org/0000-0001-7783-620X>;

[mishell.ortiz@yachaytech.edu.ec](mailto:mishell.ortiz@yachaytech.edu.ec);

[lspencer@yachaytech.edu.ec](mailto:lspencer@yachaytech.edu.ec);

[spencerlilian@gmail.com](mailto:spencerlilian@gmail.com)

<sup>2</sup>School of Chemical Sciences and Engineering, Yachay Tech University, San

Miguel de Urququí, Ecuador; [hmrodriguez@yachaytech.edu.ec](mailto:hmrodriguez@yachaytech.edu.ec)

<sup>3</sup>Dpto. de Tecnología de Procesos Biológicos y Bioquímicos. Universidad Simón Bolívar,  
Venezuela, [elucci@usb.ve](mailto:elucci@usb.ve)

<sup>4</sup>Laboratory of Organic Synthesis, Faculty of Chemistry, Habana University, 10400  
Habana, Cuba.

<sup>5</sup>University of Guayaquil, Faculty of Natural Sciences, Av. Raúl Gómez Lince s/n y

Av. Juan Tanca Marengo, Guayaquil, Ecuador. <https://orcid.org/0000-0002-2476->

7279; [beatrizpernia@gmail.com](mailto:beatrizpernia@gmail.com)

<sup>6</sup>Cell Biology Department, Simón Bolívar University, Valle de Sartenejas, Caracas,  
Venezuela

<sup>7</sup>Biology Center, Central University of Ecuador, Quito, Ecuador.

\* Correspondence should be addressed to Lilian M. Spencer; [spencerlilian@gmail.com](mailto:spencerlilian@gmail.com)

**Supporting Information**

## Result of UHPLC

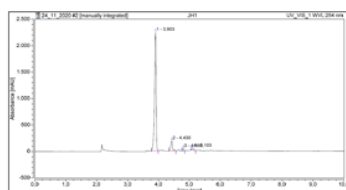

(a) UHPLC profile of JH1 compound, 2-(5-(6-[5-(Carboxymethyl)-2-thioxo-1,3,5-thiadiazinan-3-yl]butyl)-6-thioxo-1,3,5-thiadiazinan-3-yl)ethanoic acid.

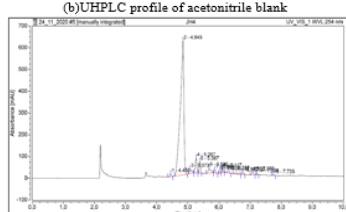

(b) UHPLC profile of acetonitrile blank

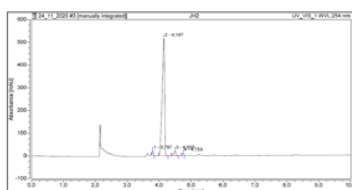

(a) UHPLC profile of JH2 compound, 2-(5-(6-[5-(carboxymethyl)-2-thioxo-1,3,5-thiadiazinan-3-yl]hexyl)-6-thioxo-1,3,5-thiadiazinan-3-yl)ethanoic acid.

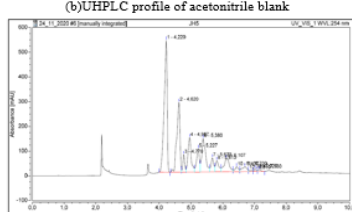

(b) UHPLC profile of acetonitrile blank

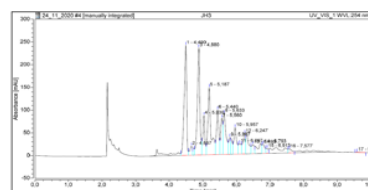

(a) UHPLC profile of JH3 compound, (2S)-2-[5-(6-[5-[(1S)-1-carboxy-3-methylbutyl]-2-thioxo-1,3,5-thiadiazin-3-yl]butyl)-6-thioxo-1,3,5-thiadiazinan-3-yl]-4-methylpentanoic acid.

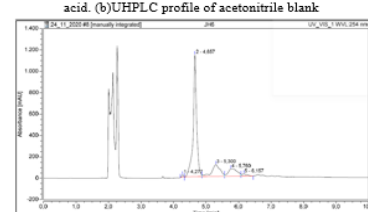

(b) UHPLC profile of acetonitrile blank

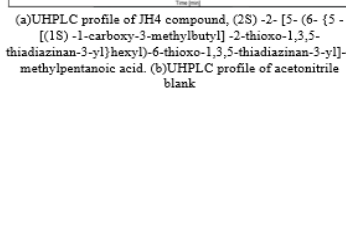

(a) UHPLC profile of JH4 compound, (2S)-2-[5-(6-[5-[(1S)-1-carboxy-3-methylbutyl]-2-thioxo-1,3,5-thiadiazinan-3-yl]hexyl)-6-thioxo-1,3,5-thiadiazinan-3-yl]-4-methylpentanoic acid.

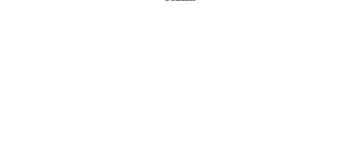

(b) UHPLC profile of acetonitrile blank

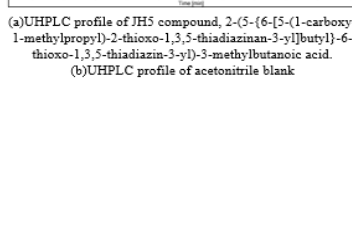

(a) UHPLC profile of JH5 compound, 2-(5-(6-[5-(1-carboxy-1-methylpropyl)-2-thioxo-1,3,5-thiadiazinan-3-yl]butyl)-6-thioxo-1,3,5-thiadiazinan-3-yl)-3-methylbutanoic acid.

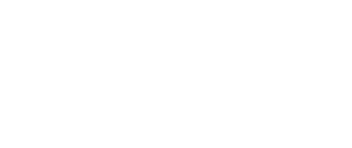

(b) UHPLC profile of acetonitrile blank

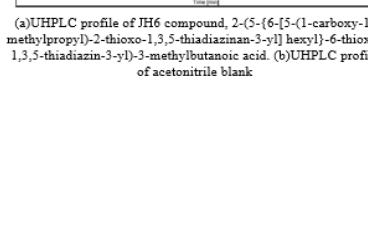

(a) UHPLC profile of JH6 compound, 2-(5-(6-[5-(1-carboxy-1-methylpropyl)-2-thioxo-1,3,5-thiadiazinan-3-yl]hexyl)-6-thioxo-1,3,5-thiadiazinan-3-yl)-3-methylbutanoic acid.

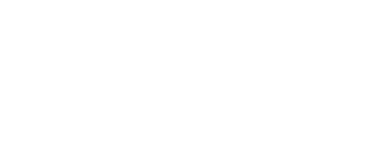

(b) UHPLC profile of acetonitrile blank
